# Supplementary material for: Tricolori triple-decker
Source: Royal Society of Chemistry journal article supplement (doi:10.1039/c2dt30549f), 1995-01-01
Supplement: c2dt30549f.pdf [file c2dt30549f.pdf]

## **Heterometallic coordination polymers incorporating dipyrin based heteroleptic copper and cobalt complexes: to Ag- $\pi$ or not?**

Antoine, Béziau, Stéphane A. Baudron\* and Mir Wais Hosseini\*

Laboratoire de Chimie de Coordination Organique, UMR CNRS 7140, Université de  
Strasbourg, F-67000, Strasbourg, France.

Email : [hosseini@unistra.fr](mailto:hosseini@unistra.fr), [sbaudron@unistra.fr](mailto:sbaudron@unistra.fr)

### **Electronic Supplementary Information**

PXRD diagrams were collected on a Bruker D8 diffractometer using monochromatic Cu-K $\alpha$  radiation with a scanning range between 4 and 40° using a scan step of 2°/mn.

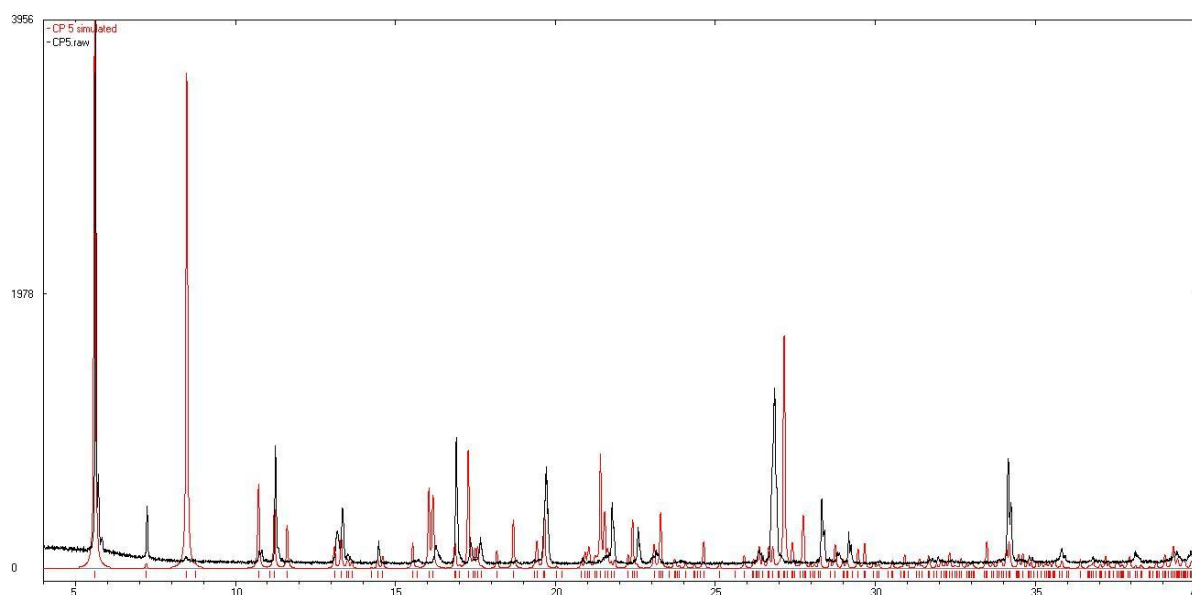

Fig 1. Simulated (black) and experimental (red) X-Ray diffraction powder pattern for CP 5. The difference in intensities results from preferential orientation.

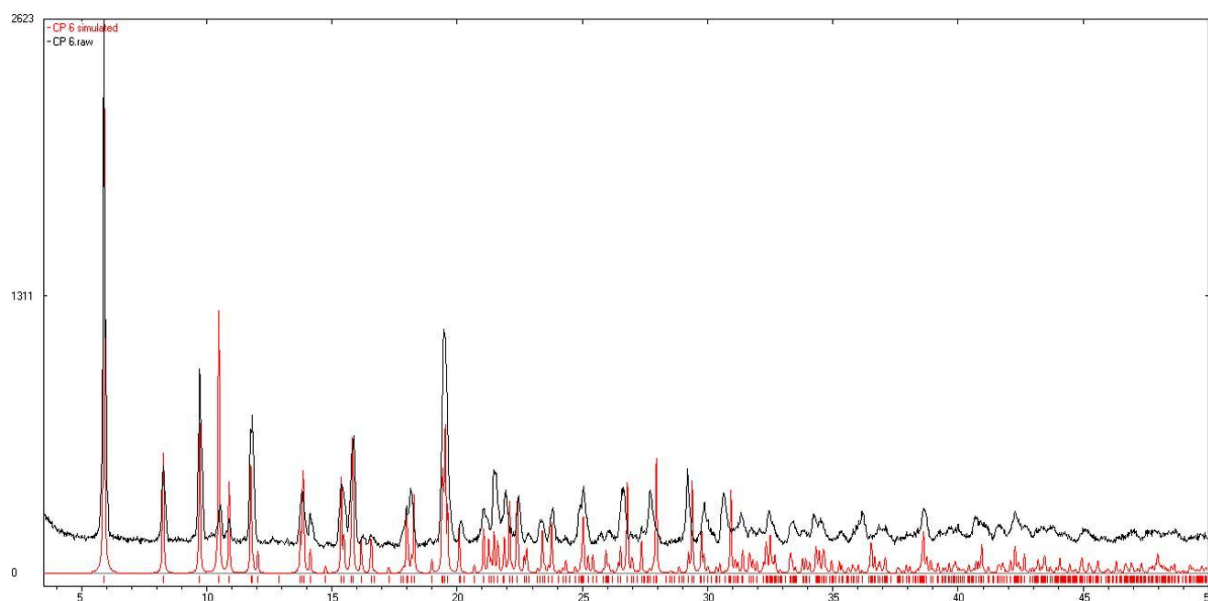

Fig. 2. Simulated (black) and experimental (red) X-Ray diffraction powder pattern for CP 6. The difference in intensities results from preferential orientation.
